# Supplementary material for: Evidence for cohesin sliding along budding yeast chromosomes
Source: PubMed Central journal article supplement (PMC4929932; doi:10.1098/rsob.150178), 2016-06-08
Supplement: rsob150178supp1.pdf [file rsob150178supp1.pdf]

# Evidence for cohesin sliding along budding yeast chromosomes

Maria Ocampo-Hafalla, Sofía Muñoz, Catarina P. Samora and Frank Uhlmann

## Supplementary Material

|                             | Page |
|-----------------------------|------|
| Supplementary figure S1     | 2    |
| Supplementary figure legend | 3    |
| Supplementary table S1      | 4    |
| Supplementary table S2      | 5    |
| Supplementary table S3      | 5    |

Figure S1

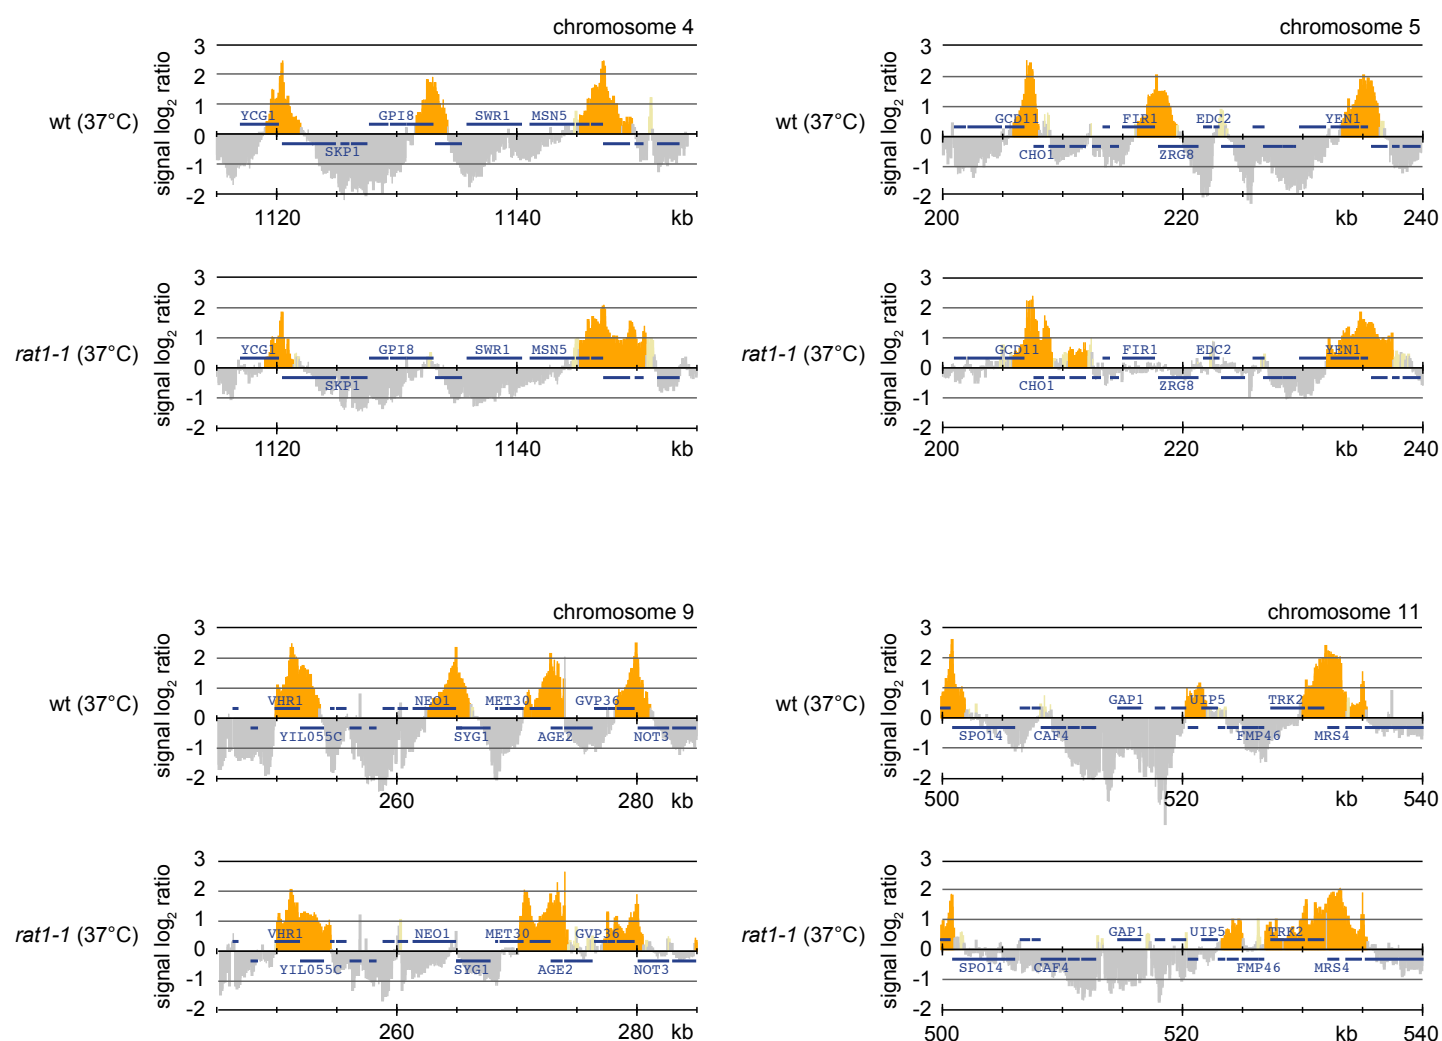

### Supplementary figure legend

**Figure S1.** Additional examples for cohesin pattern changes following *rat1-1* inactivation. As figure 6*b*, but cohesin association along the indicated regions from chromosomes 4, 5, 9 or 11 is compared between wild type and *rat1-1* cells at 37 °C.

**Supplementary table S1.** Yeast strains used in this study.

|        |                                                                                                                                               |
|--------|-----------------------------------------------------------------------------------------------------------------------------------------------|
| Y2269: | <i>MATa</i> <i>SCC1-Pk<sub>9</sub>::TRP1</i>                                                                                                  |
| Y2270: | <i>MATa</i> <i>scc2-4, SCC1-Pk<sub>9</sub>::TRP1</i>                                                                                          |
| Y2342: | <i>MATa</i> <i>scc4Δ::HIS3, LEU2::scc4-4, SCC1-Pk<sub>9</sub>::TRP1</i>                                                                       |
| Y2329: | <i>MATa</i> <i>SCC1-Pk<sub>3</sub>::HIS3</i>                                                                                                  |
| Y2330: | <i>MATa</i> <i>smc1R58A::LEU2, smc3R58A::TRP1, SCC1-Pk<sub>3</sub>::HIS3</i>                                                                  |
| TR96:  | <i>MATa</i> <i>SCC1-myc<sub>9</sub>::TRP1</i>                                                                                                 |
| Y3398: | <i>MATa</i> <i>wpl1Δ::kanR, SCC1-myc<sub>9</sub>::TRP1, LEU2::tetR-GFP,</i><br><i>URA3::TetOs</i>                                             |
| Y2279: | <i>MATa</i> <i>scc2-4, SCC1-Pk<sub>9</sub>::TRP1, LEU2::GAL1 promoter-SCC1-HA<sub>3</sub></i>                                                 |
| Y4843  | <i>MATa</i> <i>SCC1-HA<sub>3</sub>::LEU2</i>                                                                                                  |
| Y875:  | <i>MATa</i> <i>GAL2 promoter-UTP20, SCC1-Pk<sub>9</sub>::TRP1</i>                                                                             |
| Y2271: | <i>MATa</i> <i>SCC1-Pk<sub>9</sub>::TRP1</i>                                                                                                  |
| Y2272: | <i>MATa</i> <i>rat1-1 SCC1-Pk<sub>9</sub>::TRP1</i>                                                                                           |
| Y3545: | <i>MATα</i> <i>cyc1-5000 cyc7-67 cyh2 SCC1-Pk<sub>3</sub>::LEU2</i>                                                                           |
| Y3546: | <i>MATα</i> <i>sua7-1 cyc1-5000 cyc7-67 cyh2 SCC1-Pk<sub>3</sub>::LEU2</i>                                                                    |
| Y3869: | <i>MATa</i> <i>T7 promoter-GAL2, SCC1-PK<sub>3</sub>::HIS3</i>                                                                                |
| Y3904: | <i>MATa</i> <i>T7 promoter-GAL2, SCC1-PK<sub>3</sub>::HIS3, ADH1 promoter-NLS-T7</i><br><i>polymerase::TRP1</i>                               |
| Y4883: | <i>MATa</i> <i>T7 promoter-GAL2, SCC1-PK<sub>3</sub>::HIS3, ADH1 promoter-NLS-T7</i><br><i>polymerase::TRP1, ADH1 promoter-NLS-LacI::LEU2</i> |

**Supplementary table S2.** qPCR primer pairs used for quantitative analysis of Sec1 chromatin immunoprecipitates at the *GAL2* locus.

| Name                 | Sequence                  |
|----------------------|---------------------------|
| <i>GAL2F</i> -2 (P1) | TTGGCCTGGATGATTCCT        |
| <i>GAL2R</i> -2 (P1) | AGCGCCCAAAGTAAACA         |
| 3'RegionF-2 (P2)     | CTTGCTTACTTATCCACTCCCA    |
| 3'RegionR-2 (P2)     | TGTACAGGGTTAATCTATAGCCACA |

**Supplementary table S3.** qPCR primer pairs used for gene expression analysis.

| Name                | Sequence               |
|---------------------|------------------------|
| <i>GAL2F</i> (SM88) | CGAACTCAGTTCAATGGAGAGT |
| <i>GAL2R</i> (SM89) | TACCGGCCATGATCAGATCT   |
| ActinF (MRT1)       | CTCCACCACTGCTGAAAGAGAA |
| ActinR (MRT2)       | CGAAGTCCAAGGCGACGTAA   |
